# Supplementary material for: Simultaneous photoluminescence import and mechanical enhancement of polymer films using silica-hybridized quantum dots
Source: Royal Society of Chemistry journal article supplement (doi:10.1039/c0jm00211a), 2010-01-01
Supplement: c0jm00211a.pdf [file c0jm00211a.pdf]

# Supplementary Information

## Simultaneous Photoluminescence Import and Mechanical Enhancement of Polymer Films Using Silica-Hybridized Quantum Dots

Li Zhou,<sup>a,b</sup> Chao Gao<sup>\*a</sup> and Weijian Xu<sup>\*b</sup>

<sup>a</sup> MOE Key Laboratory of Macromolecular Synthesis and Functionalization, Department of Polymer Science and Engineering, Zhejiang University, 38 Zheda Road, Hangzhou 310027, P. R. China

<sup>b</sup> Institute of Polymer Science and Engineering, College of Chemistry and Chemical Engineering, Hunan University, Changsha 410082, P. R. China

\* To whom correspondence should be addressed. E-mail: chaogao@zju.edu.cn (C. Gao), weijxu@hnu.cn (W.J. Xu).

**Figure S1**

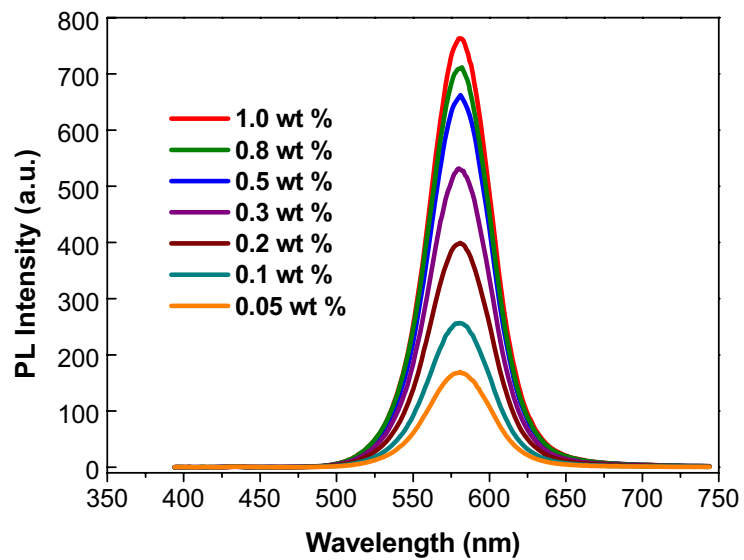

**Figure S1.** Emission spectra of SiO<sub>2</sub>-*h*-QD-MSMA/PMMA nanocomposites films filled with different content of SiO<sub>2</sub>-*h*-QD-MSMAs.

**Figure S2**

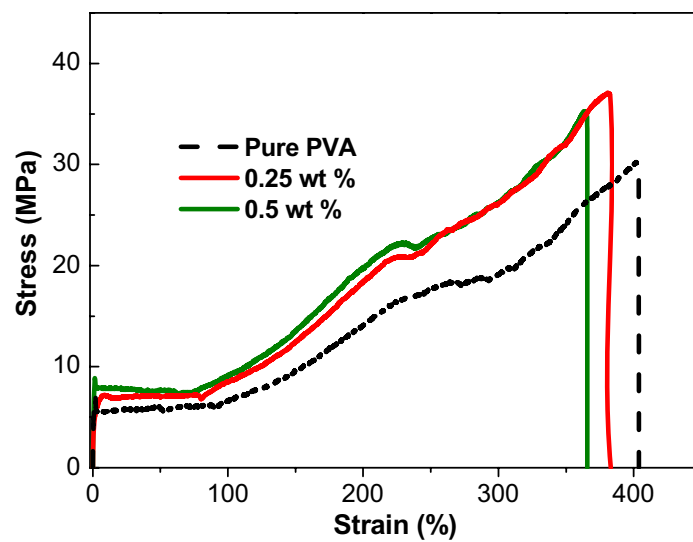

**Figure S2.** Representative stress-strain curves of pure PVA and SiO<sub>2</sub>-*h*-QD/PVA nanocomposites.

**Figure S3**

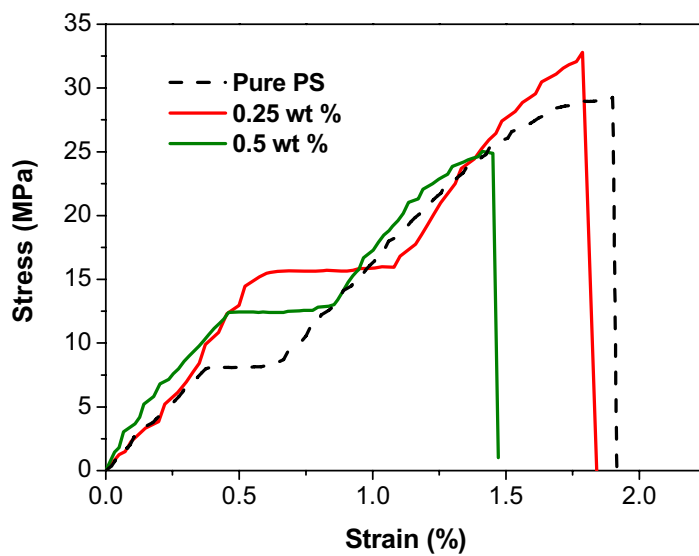

**Figure S3.** Representative stress-strain curves of pure PS and composites of PS filled with unmodified SiO<sub>2</sub>-*h*-QDs.

**Figure S4**

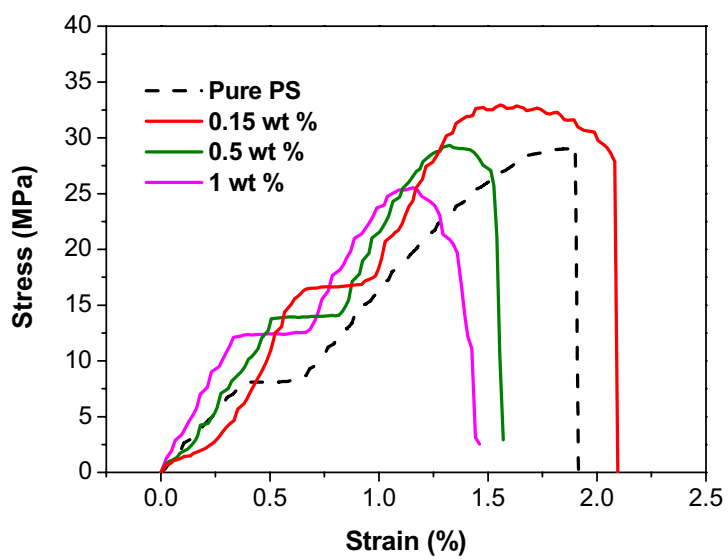

**Figure S4.** Representative stress-strain curves of pure PS and composites of PS filled with SiO<sub>2</sub>-MSMAs.
